# Supplementary material for: Selenium and sulfur inhomogeneity in free-standing ternary Sb2(Se,S)3 alloyed nanorods
Source: Royal Society of Chemistry journal article supplement (doi:10.1039/d0ce00916d), 2020-01-01
Supplement: d0ce00916d1.pdf [file d0ce00916d1.pdf]

## Electronic Supplementary Information (ESI)

### Selenium and sulfur inhomogeneity in free-standing ternary

### $\text{Sb}_2(\text{Se,S})_3$ alloyed nanorods

Junli Wang,<sup>\*a</sup> Fan Guan,<sup>a</sup> Lijun Zhao,<sup>a</sup> Longhua Li,<sup>b</sup> Junhao Zhang<sup>c</sup> and Tingting Wang<sup>\*a</sup>

<sup>a</sup>School of Materials Science & Engineering, Jiangsu University, Zhenjiang 212013, PR China

<sup>b</sup>School of Chemistry & Chemical Engineering, Jiangsu University, Zhenjiang 212013, PR China

<sup>c</sup>School of Environmental and Chemical Engineering, Jiangsu University of Science and Technology, Zhenjiang 212003, PR China

Fig. S1-S10

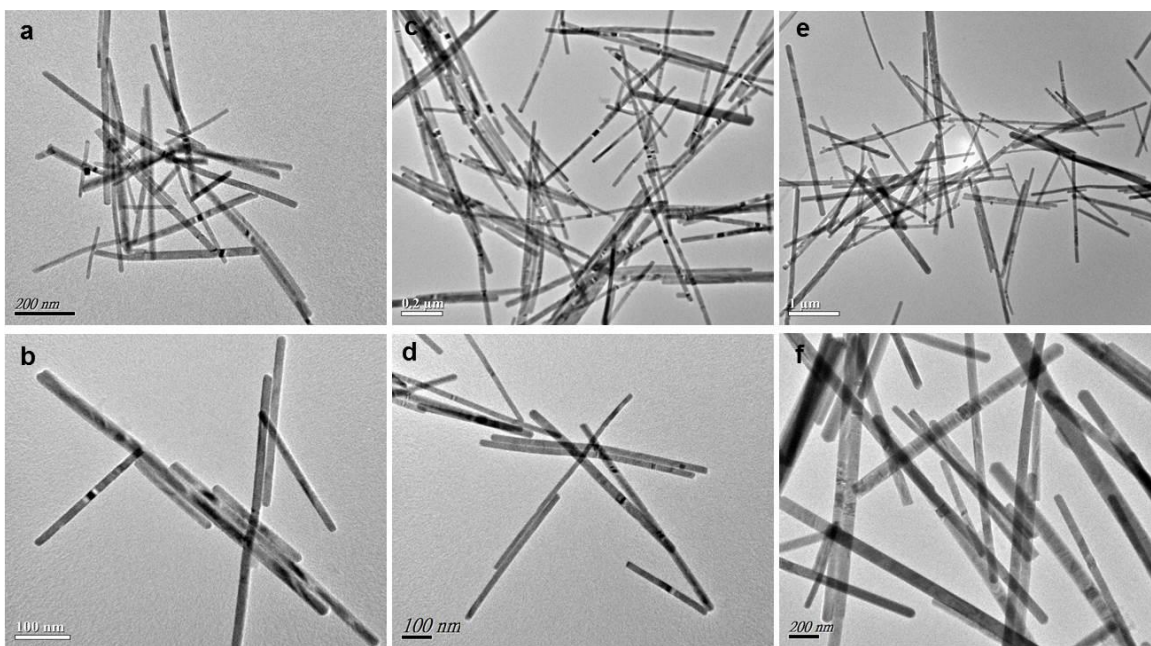

**Fig. S1** TEM images of Sb–Se–S NRs prepared at different  $\text{SeS}_2/\text{SbCl}_3$  ratios: (a,b) 0.5:1, (c,d) 1:1, and (e,f) 1.5:1.

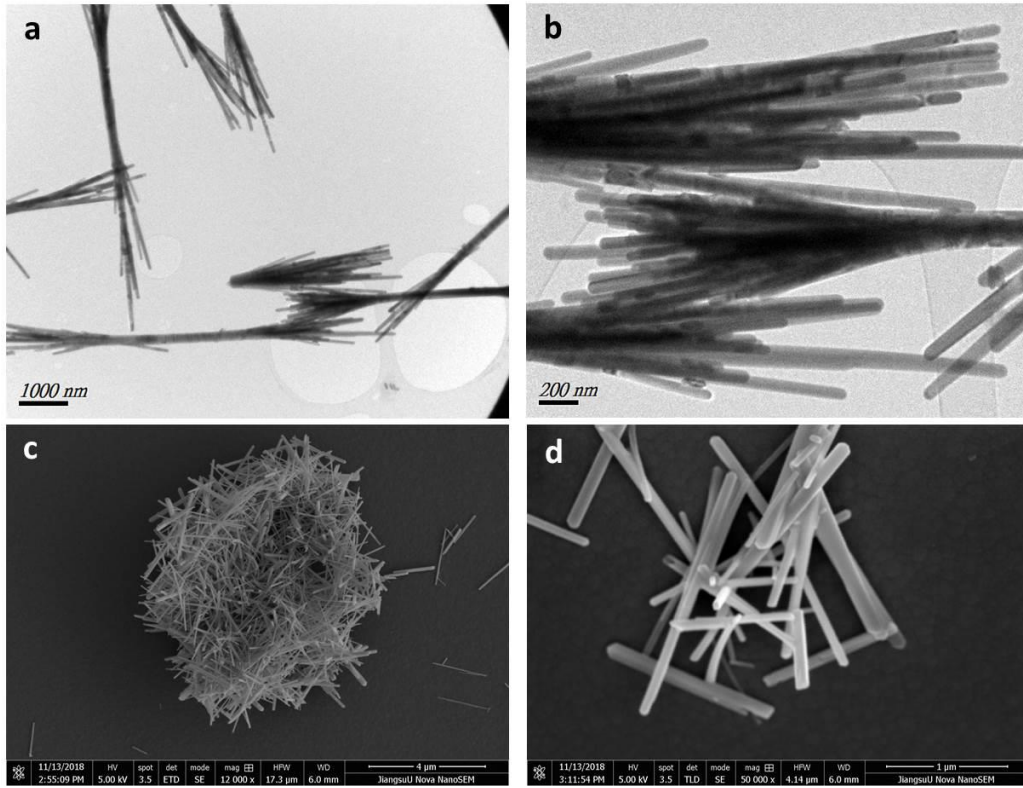

**Fig. S2** (a,b) TEM images of  $\text{Sb}_2\text{S}_3$  sheaf-like nanostructures composed of many secondary NRs (or rod-bundles, see Ref. 8 and 41 in the main text); (c,d) SEM images of  $\text{Sb}_2\text{Se}_3$  NRs. They were produced respectively from the reactions of  $\text{SbCl}_3$  elemental S and Se powder in oleylamine at 200 °C for 2 h.

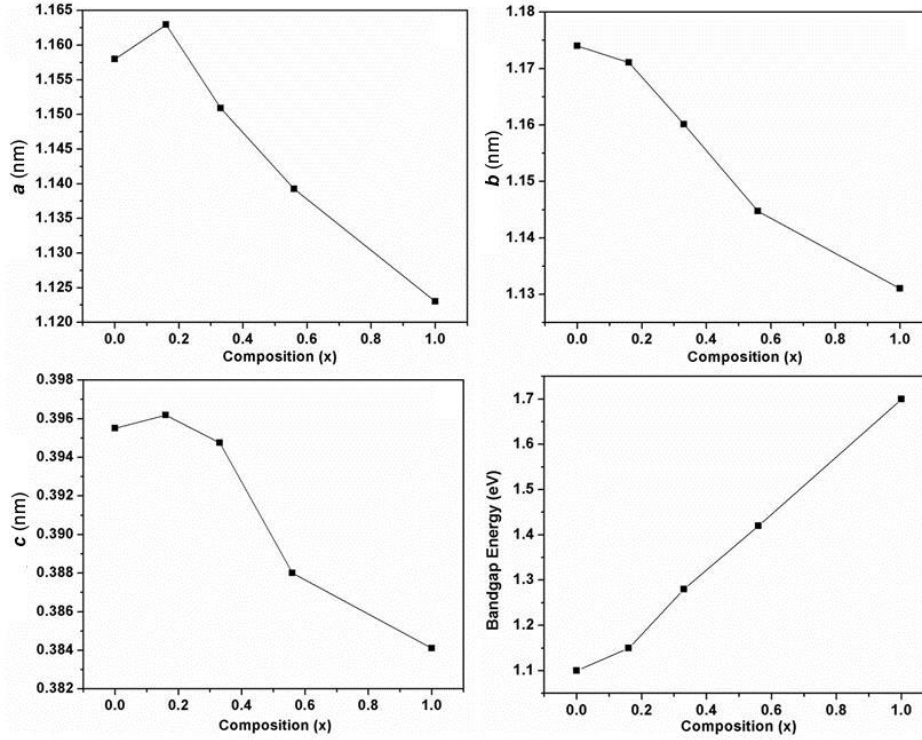

**Fig. S3** Lattice parameters  $a$ ,  $b$ ,  $c$  and  $E_g$  values against the S composition change for  $\text{Sb}_2(\text{Se}_{1-x}\text{S}_x)_3$  NRs prepared at 1.5:1, 1:1 and 0.5:1  $\text{SeS}_2/\text{SbCl}_3$  ratios.  $x$  represents the S fraction, that is, 0.16, 0.32 and 0.56 for three  $\text{SeS}_2/\text{SbCl}_3$  ratios (Table 1).

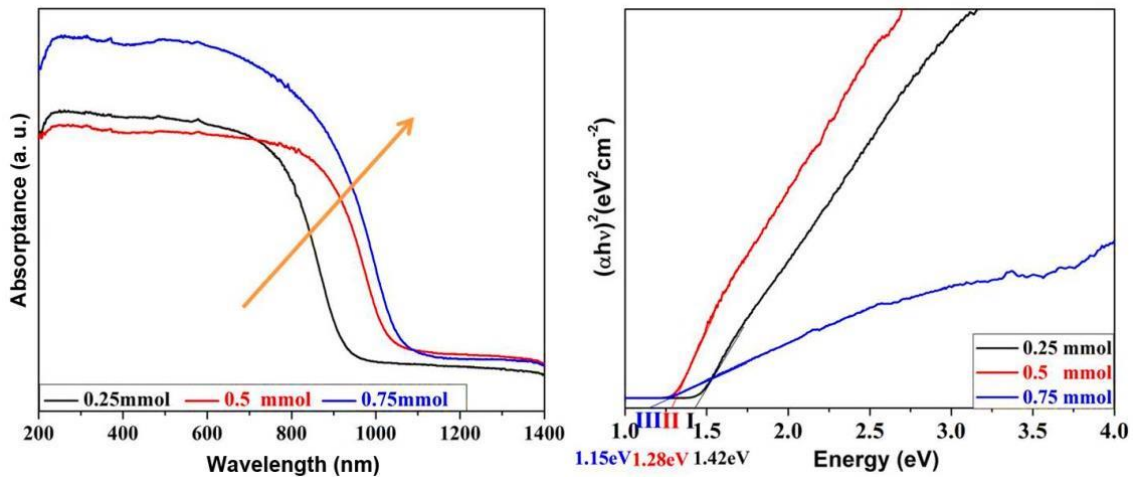

**Fig. S4** UV-Vis absorption spectra and the corresponding Tauc fitting plots of prepared at different amounts of  $\text{SeS}_2$  as labeled in the figure ( $\text{SeS}_2/\text{SbCl}_3$  ratios = 0.5:1, 1:1 and 1.5:1).

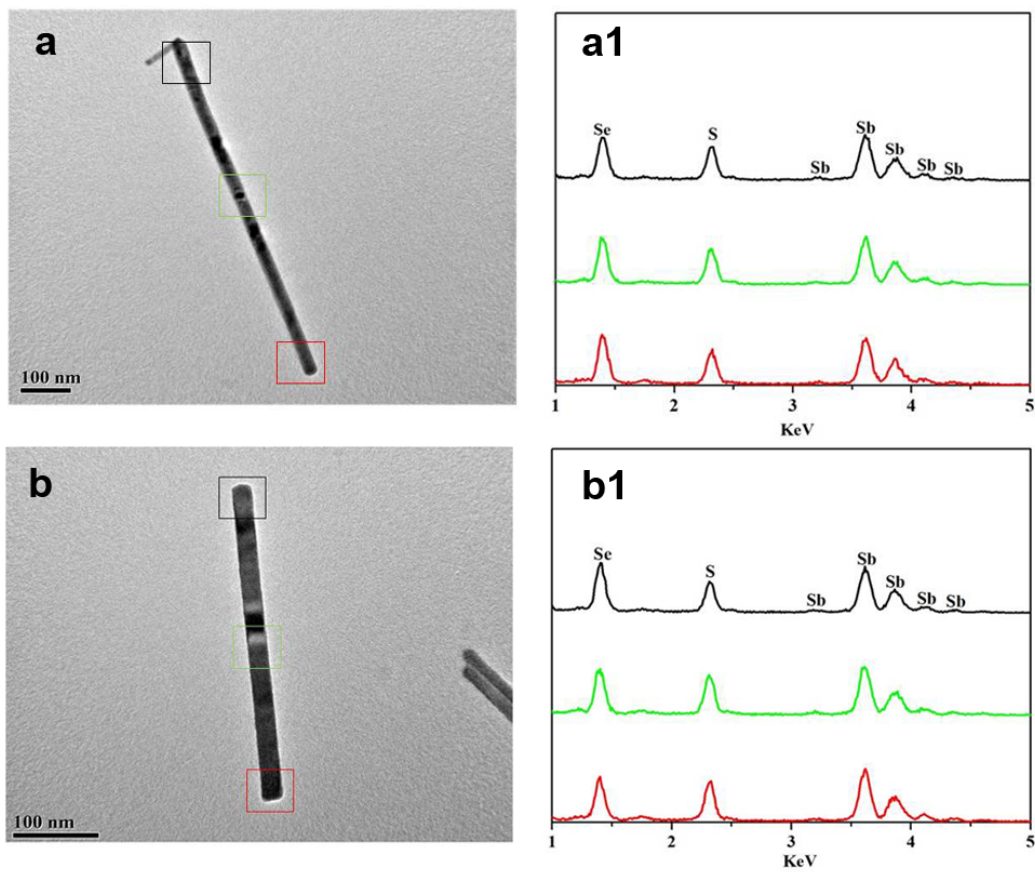

**Fig. S5** TEM images and the corresponding EDS spectra of individual Sb–Se–S NRs prepared at 0.5:1  $\text{SeS}_2/\text{SbCl}_3$  ratio.

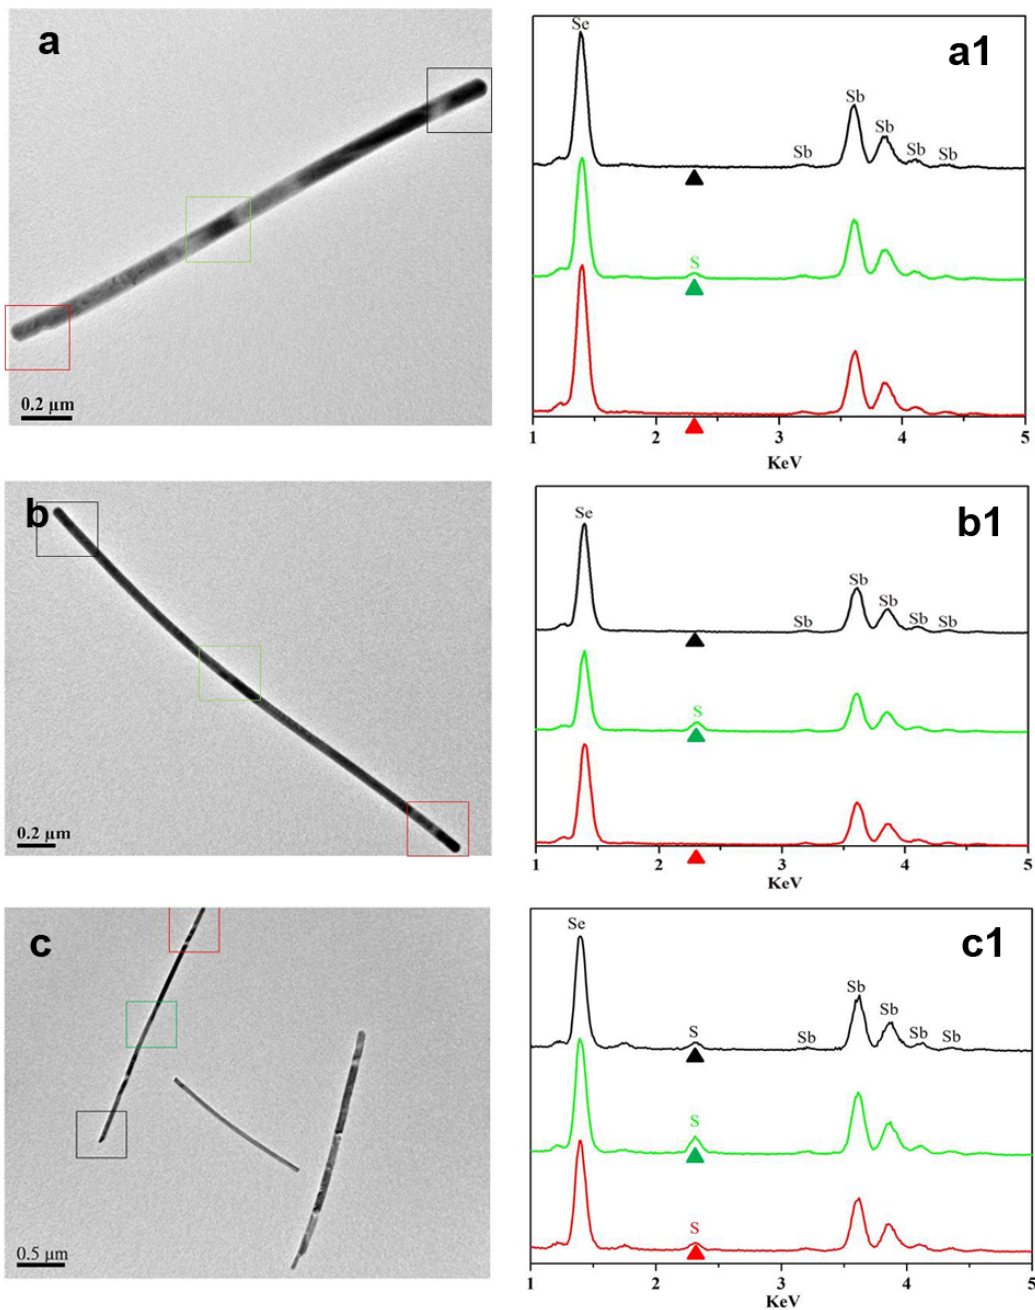

**Fig. S6** TEM images and the corresponding EDS spectra of individual Sb–Se–S NRs prepared at 1.5:1  $\text{SeS}_2/\text{SbCl}_3$  ratio.

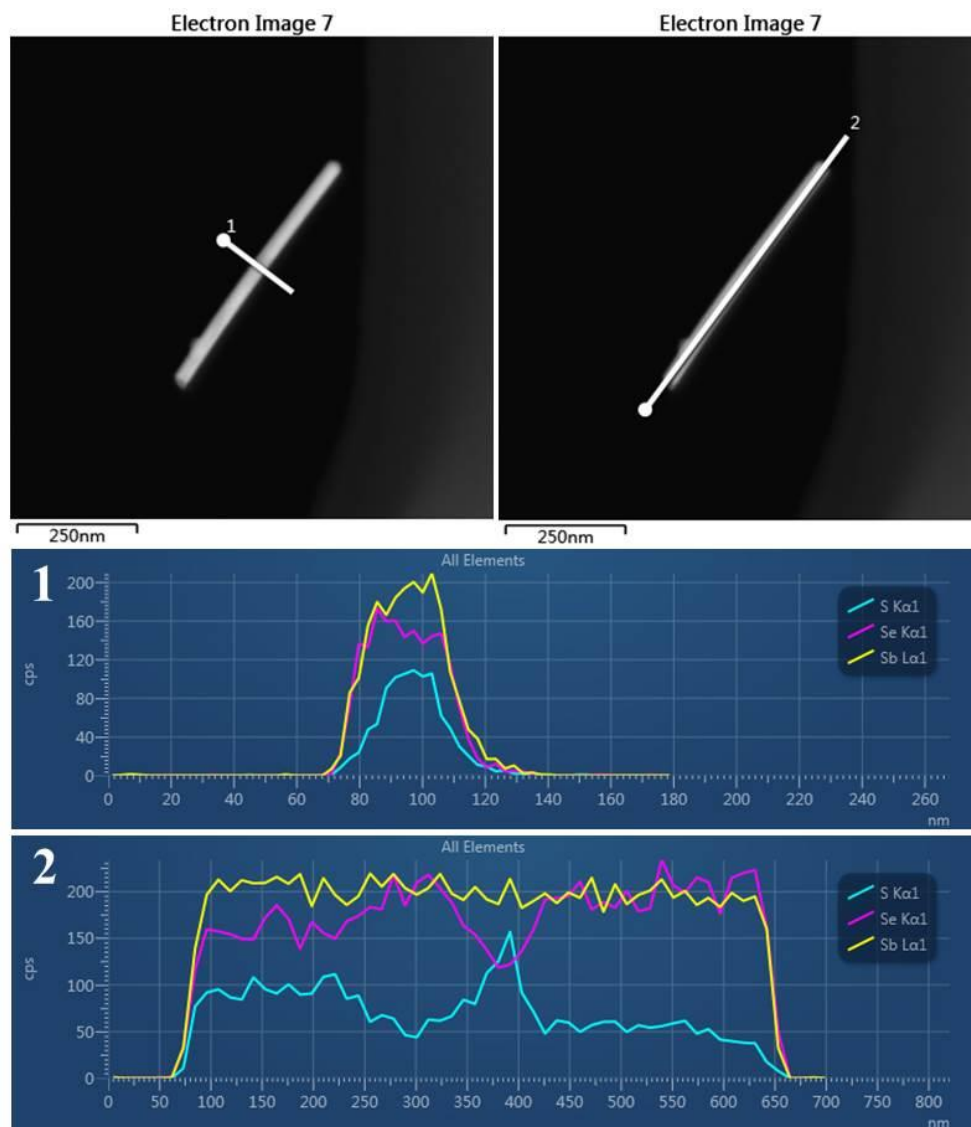

**Fig. S7** HAADF-STEM images and EDS line-scan spectra of another Sb–Se–S NR synthesized at 1.5:1 SeS<sub>2</sub>/SbCl<sub>3</sub> ratio. EDS line-scans were respectively recorded along the transverse and longitudinal directions of the NR marked with Line 1 and 2.

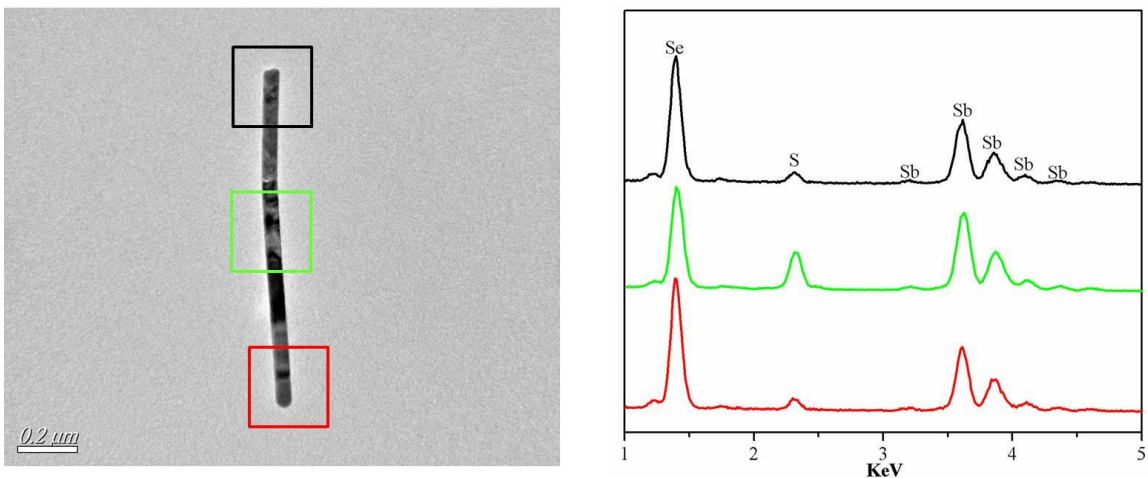

**Fig. S8** TEM image and the corresponding EDS spectra of individual Sb–Se–S NR prepared from 1:1  $\text{SeS}_2/\text{SbCl}_3$  ratio.

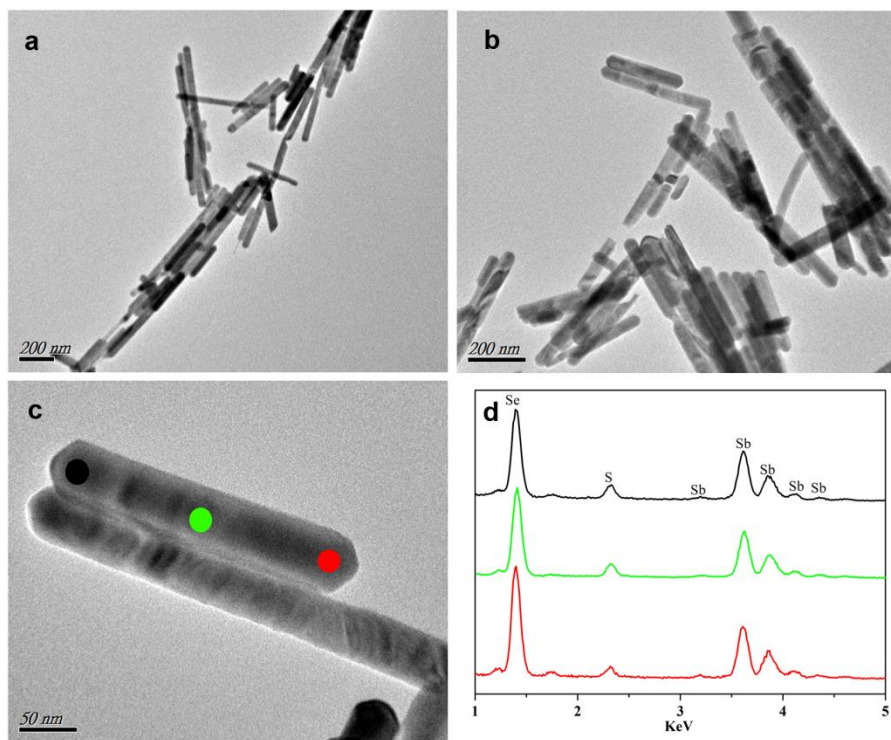

**Fig. S9** (a-c) TEM images of NRs collected at the reaction time of 30 min in the synthesis with 1.5:1  $\text{SeS}_2/\text{SbCl}_3$  ratio; (d) EDS spot-mode analyses recorded on the middle and two ends of the NR (shown in panel c) marked with black, green and red spots.

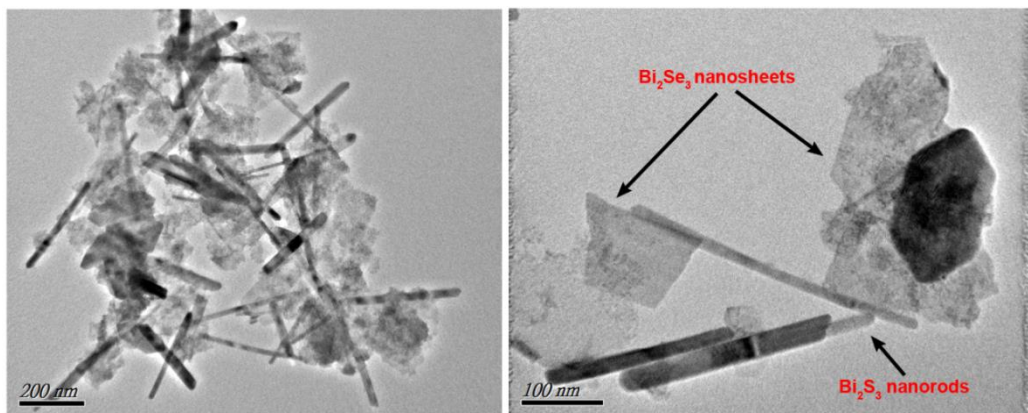

**Fig. S10** TEM images of the mixture products of Bi<sub>2</sub>S<sub>3</sub> nanorods and Bi<sub>2</sub>Se<sub>3</sub> nanosheets, which were prepared by the reaction of BiCl<sub>3</sub> with SeS<sub>2</sub> in 10-mL oleylamine at 200 °C for 2.5 h.
